# Supplementary material for: Novel Influenza Vaccines: From Research and Development (R&D) Challenges to Regulatory Responses
Source: MDPI journal article supplement (doi:10.3390/vaccines11101573), 2023-10-09
Supplement: s1 [file s1]

**Supplementary Table S1.** The classifications and characteristics of influenza vaccines referred in this review

| Classification        |                             | Definition                                                                                                      | Composition /Indication                                                                               | Platform / production technology / design strategy                                                                                            | Approval conditions |
|-----------------------|-----------------------------|-----------------------------------------------------------------------------------------------------------------|-------------------------------------------------------------------------------------------------------|-----------------------------------------------------------------------------------------------------------------------------------------------|---------------------|
| Conventional vaccines |                             | Platforms (technologies) in influenza vaccines licensed before 21 <sup>st</sup> century                         | H5N1; H1N1; H3N2; Yamagata; Victoria                                                                  | Platform: split (IIV) , subunit (IIV); Production technology: egg-based                                                                       | Y                   |
| Novel vaccines        | Current iterative vaccines  | Platforms (technologies) in influenza vaccines licensed after 21 <sup>st</sup> century                          |                                                                                                       | Platform: LAIV, RIV, new adjuvants; Production technology: cell-based production                                                              |                     |
|                       | Next-generation vaccines    | Novel platforms (technologies) licensed for other vaccines                                                      |                                                                                                       | Platform: mRNA, viral vector platform etc.                                                                                                    | N                   |
|                       | Universal (design) vaccines | Prevent morbidity and mortality caused by all pandemic and emerging influenza A and influenza B viruse subtypes | Protection from all influenza A and influenza B viruse subtypes and long-lasting efficacy (3-5 years) | Platform: VLP, nanoparticle, viral vector and nucliec acid etc.<br><br>Design strategy: conserved antigena such as HA stalk, M2e, NP, NA etc. | N                   |
